# Supplementary material
Source: PubMed Central journal article supplement (PMC2394989)
Supplement: supp_190_10_3494__1.pdf [file supp_190_10_3494__1.pdf]

## SUPPLEMENTAL MATERIAL

### Horizontal Transfer of *lux* Genes in *Vibrionaceae*

Henryk Urbanczyk, Jennifer C. Ast, Allison J. Kaeding, James D. Oliver, and Paul V. Dunlap

For amplification of *recA*, we used primers:

5'-TGGACGAGAATAAACAGAAGGC-3'

5'-CCGTTATAGCTGTACCAAGCGCCC-3'

Annealing was done at 45°C. The primers were originally reported by Ast and Dunlap (2005).

For amplification of *pyrH*, we used primers:

5'-ATGASNACBAAYCCWAAACC-3'

5'-GTRAABGCNGMYARRTCCA-3' or 5'-GAATCGGCATTTTATGGTCACG-3'. Annealing was done at 48°C or 50°C. Two of the primers were originally reported by Thompson *et al.* (2005).

For amplification of *gyrB*, we used primers:

5'-GAAGTTATCATGACGGTACTTC-3'

5'-AGCGTACGAATGTGAGAACC-3'

Annealing was done at 48°C. The primers were originally reported by Ast and Dunlap (2005).

For amplification of sequences of *lux* operon we used primer pairs given below. Annealing temperatures were 45°C, 48°C or 50°C.

Primers used for *lux* operon amplification and sequencing in *V. vulnificus* VVL1 and *V. harveyi* ATCC 14126<sup>T</sup>.

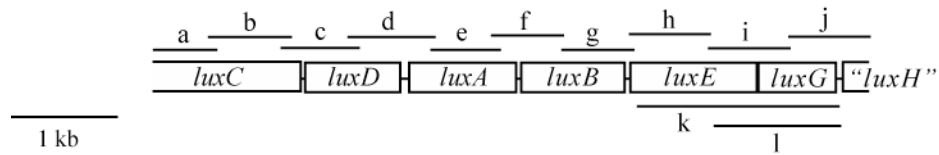

a) This primer pair was only used for *V. harveyi* ATCC 14126<sup>T</sup>.

5'-GCTCTTGATATGGAAAAACACTTACC-3'

5'-GAGTGTCGTATCCGATGCATGAGG-3'

b) 5'-GCGCTAGCGATGAGCTTTATTGAC-3'

5'-GCTCTATTTTCGACAGATACATCCTTAG-3'

c) 5'-CCAAGAAATATCGAGATGCATTCG-3'

5'-CAGTCGCGAACGAACACTTCAGAACC-3'

d) 5'-CGCTTGGTTTTGATTACCTCAGTTTG-3'

5'-TATCCATGTCTGTACCAAAGACACG-3'

e) 5'-CTACTGGATCAAATGTCAAAAGGACG-3'

5'-TCAGAACCGTTTGCTTCAAAACC-3'

[Note. These primers were originally reported by Wimpee *et al.* (1991).]

f) 5'-TTATCCAGCAAGATATYGATGCGACG-3'

5'-TTCGACGCCATCTAACCACTTCTT-3'

g) 5'-GCATTCACTACTGGGTACTGCCATC-3'

5'-GCTGAGGAGTTCCCATGAAAATCAAG-3'

h) 5'-GCAGCGATGCCCCTTATATCACCATTC-3'

5'-GTTGGTTGACTCGTCTCTATCGAGC-3'

i) This primer pair was only used for *V. harveyi* ATCC 14126<sup>T</sup>.

5'-CGAGCAAGGTCAAACCTTCAATGG-3'

5'-GGTTTGACACTCTCATCACGCAGC-3'

j) This primer pair was only used for *V. harveyi* ATCC 14126<sup>T</sup>.

5'-CGTTTTTAGAACTCCATATTGGTGG-3'

5'-CCAATTGGCGCGTTCCTCCGTTAAGC-3'

k) This primer pair was only used for *V. vulnificus* VVL1.

5'-GCAGCGATGCCCCCTTATATCACCATC-3'

5'-GCCATTTTTTCAGAGCCTCAATCGCTC-3'

l) This primer pair was only used for *V. vulnificus* VVL1.

5'-TCTATCTACTGTGCTGTTTCATGCG-3'

5'-GCCATTTTTTCAGAGCCTCAATCGCTC-3'

Primers used for *lux* operon amplification and sequencing in *V. orientalis* ATCC 33934<sup>T</sup>. [Note. Portion of *luxD* and *luxA* sequences of *V. orientalis* ATCC 33934<sup>T</sup> was previously sequenced. See GenBank accession number AB058948.]

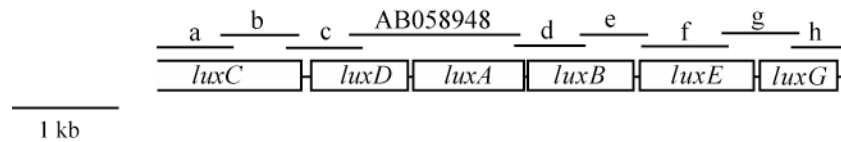

a) 5'-GCTCTTGATATGGAAAAACACTTACC-3'

5'-CGAGGCGGCTTCTTCTAGATCGGCTG-3'

b) 5'-GCGCTAGCGATGAGCTTTATTGAC-3'

5'-GCTCTATTTTCGACAGATACATCCTTAG-3'

c) 5'-CCAAGAAATATCGAGATGCATTCG-3'

5'-CAGTCGCGAACGAACACTTCAGAACC-3'

d) 5'-TTATCCAGCAAGATATYGATGCGACG-3'

5'-TTCGCAGCCCATCTAACCACTTCTT-3'

- e) 5'-GCATTCACTACTGGGTACTGCCATC-3'  
5'-GCTGAGGAGTTCCCATGAAAATCAAG-3'
- f) 5'-GCAGCGATGCCCTTATATCACCATTC-3'  
5'-GTTGGTTGACTCGTCTCTATCGAGC-3'
- g) 5'-TCTATCTACTGTGCTGTTTCATGCG-3'  
5'-GGTTTGACACTCTCATCACGCAGC-3'
- h) 5'-CGTTTTTAGAACTCCATATTGGTGG-3'  
5'-GCCATTTTTTCAGAGCCTCAATCGCTC-3'

Primers used for *lux* operon amplification and sequencing in *V. chagasii* SB52 and *V. chagasii* 21-N12.

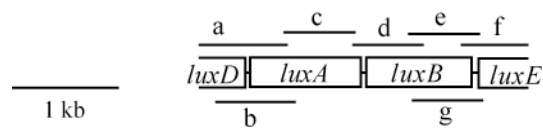

- a) This primer pair was only used for *V. chagasii* 21N-12.

5'-CGCTTGGTTTTGATTACCTCAGTTTG-3'

5'-TATCCATGTCTGTACCAAAGACACG-3'

- b) This primer pair was only used for *V. chagasii* SB-52.

5'-CATAAGCTTGGTTCTGAAGTG-3'

5'-ATCAAGTCATACCAACAATCCATC-3'

- c) 5'-CTACTGGATCAAATGTCAAAAGGACG-3'

5'-TCAGAACCGTTTGCTTCAAACC-3'

[Note. These primers were originally reported by Wimpee *et al.* (1991).]

- d) 5'-TTATCCAGCAAGATATYGATGCGACG-3'

5'-TTCGCAGCCCATCTAACCACTTCTT-3'

- e) This primer pair was only used for *V. chagasii* 21N-12.

5'-CTYGACCARATGAGTGAAGG-3'

5'-GAATGGTGATATAAGGGGCATC-3'

f) This primer pair was only used for *V. chagasii* 21N-12.

5'-CCTCAGTRACAGTAAATGCGGTCG-3'

5'-GAGCTGTTGTCAGAAAATGCCATCG-3'

g) This primer pair was only used for *V. chagasii* SB-52.

5'-CTYGACCARATGAGTGAAGG-3'

5'-GCTGAGGAGTTCCCATGAAAATCAAG-3'

Primers used for *lux* operon amplification and sequencing in *V. cholerae* manz.1.1 and *V. cholerae* manz.1.2.

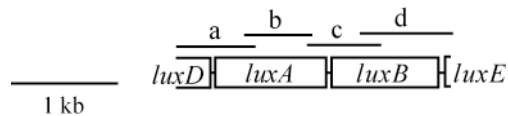

a) 5'-CAGAGCCTTGTGTCATGCCTGTCG-3'

5'-CTCGATCCCTTTCATTGCGTTTACCG-3'

b) 5'-CTACTGGATCAAATGTCAAAAGGACG-3'

5'-TCAGAACCGTTTGCTTCAAACC-3'

[Note. These primers were originally reported by Wimpee *et al.* (1991).]

c) 5'-GACTTTAATAAAGGGCAATGGC-3'

5'-CTATAAAAGTCATTATTTGGATGGC-3'

d) 5'-CAGTGATTGTGAAAACCGCGACG-3'

5'-GTCAGCATTGTTCTGATAGTGCC-3'

Primers used for *lux* operon amplification and sequencing in *P. damsela* BT-6.

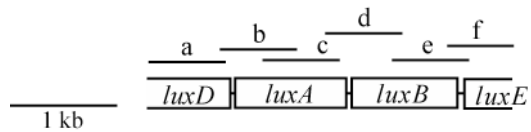

- a) 5'-ATTGGTGATAACCGTTATATTCGAGT-3'  
5'-ACCTAGACGCTAGCCAATTCATCT-3'
- b) 5'-TTCAGATGGCGATGATTGGGTTTGCC-3'  
5'-TTCTAATTGTGCTACTTTTTCACTGAT-3'
- c) 5'-GTTTTAGATCAACTGTCTAAAGGRCG-3'  
5'-TCAGAACCATTTCGCTTCAAATCCAAC-3'
- d) 5'-TACAATGARRTTGCRGCWGARCATGG-3'  
5'-TCRTARCANGCTTCRAATTGYSGYTG-3'
- e) 5'-CTCTCTGAATCAGGTAATTACAAC-3'  
5'-TAATATCATCTATTTCTGTACTCAC-3'
- f) 5'-AATGTTGATCATCAATTCCCGCTACTG-3'  
5'-AAATAAAATACGGAGGGCCAATTAAAC-3'

Primers used for *lux* operons amplification and sequencing in *P. mandapamensis* *ajpao.4.20* are the same as reported by Ast *et al.* (2007).

## REFERENCES

- Ast, J. C., and P. V. Dunlap.** 2005. Phylogenetic resolution and habitat specificity of members of the *Photobacterium phosphoreum* species group. *Environ. Microbiol.* **7**:1641-1654.
- Ast, J. C., H. Urbanczyk, and P. V. Dunlap.** 2007. Natural merodiploidy of the *lux-rib* operon of *Photobacterium leiognathi* from coastal waters of Honshu, Japan. *J. Bacteriol.* **189**:6148-6158.
- Thompson F. L., D. Gevers, C. C. Thompson, P. Dawyndt., S. Naser, B. Hoste, C. B. Munn, and J. Swings.** 2005. Phylogeny and molecular identification of vibrios on the basis of multilocus sequence

analysis. *Appl. Environ. Microbiol.* **71**:5107-5115.

**Wimpee, C. F., T. L Nadeau, and K. H. Nealson.** 1991. Development of species-specific hybridization probes for marine luminous bacteria by using in vitro DNA amplification. *Appl. Environ. Microbiol.* **57**:1319-1324.
